# Supplementary material
Source: publisher figshare collection journal article supplement (https://acs.figshare.com/ndownloader/files/3904033)
Supplement: Supplementary file 1 [file 3904033]

#===END  
data_130905_lzx0905 (4ak) 
 
_audit_creation_method            SHELXL-97 
_chemical_name_systematic 
; 
 ? 
; 
_chemical_name_common             ? 
_chemical_melting_point           ? 
_chemical_formula_moiety         'C41 H30 N2 O8 S'  
_chemical_formula_sum 
 'C41 H30 N2 O8 S' 
_chemical_formula_weight          710.73 
 
loop_ 
 _atom_type_symbol 
 _atom_type_description 
 _atom_type_scat_dispersion_real 
 _atom_type_scat_dispersion_imag 
 _atom_type_scat_source 
 'C'  'C'   0.0033   0.0016 
 'International Tables Vol C Tables 4.2.6.8 and 6.1.1.4' 
 'H'  'H'   0.0000   0.0000 
 'International Tables Vol C Tables 4.2.6.8 and 6.1.1.4' 
 'N'  'N'   0.0061   0.0033 
 'International Tables Vol C Tables 4.2.6.8 and 6.1.1.4' 
 'O'  'O'   0.0106   0.0060 
 'International Tables Vol C Tables 4.2.6.8 and 6.1.1.4' 
 'S'  'S'   0.1246   0.1234 
 'International Tables Vol C Tables 4.2.6.8 and 6.1.1.4' 
 
_symmetry_cell_setting            orthorhombic
_symmetry_space_group_name_H-M    'P 21 21 21' 
_symmetry_space_group_name_Hall   'P 2ac 2ab'
 
loop_ 
 _symmetry_equiv_pos_as_xyz 
 'x, y, z' 
 '-x+1/2, -y, z+1/2' 
 'x+1/2, -y+1/2, -z' 
 '-x, y+1/2, -z+1/2' 
 
_cell_length_a                    7.1363(5) 
_cell_length_b                    21.1151(17) 
_cell_length_c                    23.2821(18) 
_cell_angle_alpha                 90.00 
_cell_angle_beta                  90.00 
_cell_angle_gamma                 90.00 
_cell_volume                      3508.2(5) 
_cell_formula_units_Z             4 
_cell_measurement_temperature     293(2) 
_cell_measurement_reflns_used   4967
_cell_measurement_theta_min     2.8486
_cell_measurement_theta_max     29.5598
 
_exptl_crystal_description        block 
_exptl_crystal_colour             yellow 
_exptl_crystal_size_max           0.42 
_exptl_crystal_size_mid           0.23 
_exptl_crystal_size_min           0.20 
_exptl_crystal_density_meas       ? 
_exptl_crystal_density_diffrn     1.346 
_exptl_crystal_density_method     'not measured' 
_exptl_crystal_F_000              1480 
_exptl_absorpt_coefficient_mu     0.151 
_exptl_absorpt_correction_type    multi-scan
_exptl_absorpt_correction_T_min   0.9394 
_exptl_absorpt_correction_T_max   0.9705 
_exptl_absorpt_process_details    
;
CrysAlis PRO (Agilent Technologies, 2011) 
;
 
_exptl_special_details 
; 
 ? 
; 
 
_diffrn_ambient_temperature       293(2) 
_diffrn_radiation_wavelength      0.71073 
_diffrn_radiation_type            MoK\a 
_diffrn_radiation_source          'fine-focus sealed tube' 
_diffrn_radiation_monochromator   graphite 
_diffrn_measurement_device_type   'Xcalibur, Atlas, Gemini ultra' 
_diffrn_measurement_method        '\w scans' 
_diffrn_detector_area_resol_mean  10.3592 
_diffrn_standards_number          ? 
_diffrn_standards_interval_count  ? 
_diffrn_standards_interval_time   ? 
_diffrn_standards_decay_%         ? 
_diffrn_reflns_number             22840 
_diffrn_reflns_av_R_equivalents   0.0996 
_diffrn_reflns_av_sigmaI/netI     0.0697 
_diffrn_reflns_limit_h_min        -8 
_diffrn_reflns_limit_h_max        8 
_diffrn_reflns_limit_k_min        -25 
_diffrn_reflns_limit_k_max        23 
_diffrn_reflns_limit_l_min        -21 
_diffrn_reflns_limit_l_max        28 
_diffrn_reflns_theta_min          2.99 
_diffrn_reflns_theta_max          25.34 
_reflns_number_total              6425 
_reflns_number_gt                 4889 
_reflns_threshold_expression      >2sigma(I) 
 
_computing_cell_refinement      'CrysAlis PRO (Agilent Technologies, 2011)' 
_computing_data_collection      'CrysAlis PRO' 
_computing_data_reduction      'CrysAlis PRO'  
_computing_molecular_graphics     'OLEX2 (Dolomanov et al., 2009)'
_computing_publication_material    'OLEX2'
_computing_structure_solution     'SHELXS-97 (Sheldrick, 2008)' 
_computing_structure_refinement   'SHELXL-97 (Sheldrick, 2008)' 
 
_refine_special_details 
; 
 Refinement of F^2^ against ALL reflections.  The weighted R-factor wR and 
 goodness of fit S are based on F^2^, conventional R-factors R are based 
 on F, with F set to zero for negative F^2^. The threshold expression of 
 F^2^ > 2sigma(F^2^) is used only for calculating R-factors(gt) etc. and is 
 not relevant to the choice of reflections for refinement.  R-factors based 
 on F^2^ are statistically about twice as large as those based on F, and R- 
 factors based on ALL data will be even larger. 
; 
 
_refine_ls_structure_factor_coef  Fsqd  
_refine_ls_matrix_type            full 
_refine_ls_weighting_scheme       calc  
_refine_ls_weighting_details 
 'calc w=1/[\s^2^(Fo^2^)+(0.0787P)^2^+0.1454P] where P=(Fo^2^+2Fc^2^)/3' 
_atom_sites_solution_primary      direct 
_atom_sites_solution_secondary    difmap 
_atom_sites_solution_hydrogens    geom 
_refine_ls_hydrogen_treatment     constr 
_refine_ls_extinction_method      none 
_refine_ls_extinction_coef        ? 
_refine_ls_abs_structure_details   'Flack (1983), 2772 Friedel pairs' 
_chemical_absolute_configuration  ad
_refine_ls_abs_structure_Flack    -0.07(11) 
_refine_ls_number_reflns          6425 
_refine_ls_number_parameters      482 
_refine_ls_number_restraints      90 
_refine_ls_R_factor_all           0.0863 
_refine_ls_R_factor_gt            0.0648 
_refine_ls_wR_factor_ref          0.1714 
_refine_ls_wR_factor_gt           0.1501 
_refine_ls_goodness_of_fit_ref    1.093 
_refine_ls_restrained_S_all       1.090 
_refine_ls_shift/su_max           0.001 
_refine_ls_shift/su_mean          0.000 
 
loop_ 
 _atom_site_label 
 _atom_site_type_symbol 
 _atom_site_fract_x 
 _atom_site_fract_y 
 _atom_site_fract_z 
 _atom_site_U_iso_or_equiv 
 _atom_site_adp_type 
 _atom_site_occupancy 
 _atom_site_symmetry_multiplicity 
 _atom_site_calc_flag 
 _atom_site_refinement_flags 
 _atom_site_disorder_assembly 
 _atom_site_disorder_group 
S1 S 0.95627(14) 0.33384(4) 0.09265(4) 0.0532(3) Uani 1 1 d . . . 
O1 O 1.1385(4) 0.35204(13) 0.10840(13) 0.0663(8) Uani 1 1 d . . . 
O2 O 0.8753(4) 0.35841(13) 0.04122(12) 0.0687(8) Uani 1 1 d . . . 
O3 O 0.7004(4) 0.24374(14) 0.02538(12) 0.0709(8) Uani 1 1 d . . . 
O4 O 1.2861(3) 0.22844(12) 0.09618(12) 0.0559(6) Uani 1 1 d . . . 
H4 H 1.2922 0.2306 0.0611 0.084 Uiso 1 1 calc R . . 
O5 O 0.6891(4) -0.02389(17) -0.01303(16) 0.0881(11) Uani 1 1 d . . . 
O6 O 1.7359(4) 0.04640(18) 0.24675(14) 0.0895(11) Uani 1 1 d . . . 
O7 O 1.505(3) -0.2203(6) 0.0860(8) 0.184(3) Uani 0.562(14) 1 d PU A 1 
O8 O 1.248(3) -0.2565(6) 0.0989(7) 0.169(3) Uani 0.562(14) 1 d PU A 1 
N1 N 0.9604(4) 0.25492(13) 0.08500(11) 0.0455(7) Uani 1 1 d . . . 
N2 N 1.326(8) -0.215(2) 0.0838(16) 0.171(3) Uani 0.562(14) 1 d PU A 1 
C1 C 0.8060(5) 0.34977(17) 0.15020(16) 0.0500(9) Uani 1 1 d . . . 
C2 C 0.6158(5) 0.34319(19) 0.14411(17) 0.0582(10) Uani 1 1 d . . . 
H2 H 0.5665 0.3292 0.1094 0.070 Uiso 1 1 calc R . . 
C3 C 0.4986(6) 0.3571(2) 0.1886(2) 0.0699(12) Uani 1 1 d . . . 
H3 H 0.3696 0.3536 0.1837 0.084 Uiso 1 1 calc R . . 
C4 C 0.5710(7) 0.3765(2) 0.2419(2) 0.0735(12) Uani 1 1 d . . . 
C5 C 0.7604(7) 0.3823(2) 0.24690(19) 0.0786(13) Uani 1 1 d . . . 
H5 H 0.8107 0.3957 0.2817 0.094 Uiso 1 1 calc R . . 
C6 C 0.8788(6) 0.3690(2) 0.20236(19) 0.0651(11) Uani 1 1 d . . . 
H6 H 1.0076 0.3729 0.2071 0.078 Uiso 1 1 calc R . . 
C7 C 0.4437(8) 0.3892(3) 0.2917(2) 0.1031(18) Uani 1 1 d . . . 
H7A H 0.3295 0.4079 0.2781 0.155 Uiso 1 1 calc R . . 
H7B H 0.5040 0.4177 0.3180 0.155 Uiso 1 1 calc R . . 
H7C H 0.4160 0.3501 0.3110 0.155 Uiso 1 1 calc R . . 
C8 C 0.8352(5) 0.22161(19) 0.04959(15) 0.0505(9) Uani 1 1 d . . . 
C9 C 0.8971(4) 0.15548(16) 0.05107(13) 0.0421(8) Uani 1 1 d . . . 
C10 C 1.0464(4) 0.14861(16) 0.08801(14) 0.0413(7) Uani 1 1 d . . . 
C11 C 1.1048(5) 0.21283(16) 0.11237(14) 0.0436(8) Uani 1 1 d . . . 
C12 C 1.0907(6) 0.21522(16) 0.17789(15) 0.0515(9) Uani 1 1 d . . . 
C13 C 1.2504(7) 0.2223(2) 0.21062(18) 0.0706(12) Uani 1 1 d . . . 
H13 H 1.3671 0.2262 0.1931 0.085 Uiso 1 1 calc R . . 
C14 C 1.2344(13) 0.2236(2) 0.2701(2) 0.102(2) Uani 1 1 d . . . 
H14 H 1.3417 0.2281 0.2925 0.122 Uiso 1 1 calc R . . 
C15 C 1.0689(13) 0.2186(3) 0.2955(2) 0.0994(19) Uani 1 1 d . . . 
H15 H 1.0611 0.2210 0.3353 0.119 Uiso 1 1 calc R . . 
C16 C 0.9089(11) 0.2099(3) 0.2638(2) 0.0961(18) Uani 1 1 d . . . 
H16 H 0.7938 0.2049 0.2820 0.115 Uiso 1 1 calc R . . 
C17 C 0.9204(7) 0.20864(19) 0.20369(17) 0.0659(11) Uani 1 1 d . . . 
H17 H 0.8128 0.2034 0.1816 0.079 Uiso 1 1 calc R . . 
C18 C 0.8262(5) 0.10565(18) 0.01930(15) 0.0497(9) Uani 1 1 d . . . 
H18 H 0.7258 0.1112 -0.0057 0.060 Uiso 1 1 calc R . . 
C19 C 0.9100(5) 0.04756(17) 0.02609(15) 0.0458(8) Uani 1 1 d . . . 
C20 C 1.0549(5) 0.03841(17) 0.06657(14) 0.0440(8) Uani 1 1 d . . . 
C21 C 1.1278(4) 0.08965(16) 0.09872(14) 0.0407(7) Uani 1 1 d . . . 
C22 C 0.8496(5) -0.00647(18) -0.01233(16) 0.0527(9) Uani 1 1 d . . . 
C23 C 0.9961(5) -0.03427(18) -0.04925(16) 0.0526(9) Uani 1 1 d . . . 
C24 C 1.1435(6) 0.0015(2) -0.06856(16) 0.0598(10) Uani 1 1 d . . . 
H24 H 1.1488 0.0444 -0.0595 0.072 Uiso 1 1 calc R . . 
C25 C 1.2840(7) -0.0251(2) -0.1012(2) 0.0770(13) Uani 1 1 d . . . 
H25 H 1.3828 -0.0005 -0.1146 0.092 Uiso 1 1 calc R . . 
C26 C 1.2755(9) -0.0882(3) -0.1134(2) 0.0957(17) Uani 1 1 d . . . 
H26 H 1.3702 -0.1067 -0.1351 0.115 Uiso 1 1 calc R . . 
C27 C 1.1299(8) -0.1249(2) -0.0943(3) 0.0973(18) Uani 1 1 d . . . 
H27 H 1.1273 -0.1680 -0.1027 0.117 Uiso 1 1 calc R . . 
C28 C 0.9892(7) -0.0983(2) -0.0631(2) 0.0731(12) Uani 1 1 d . . . 
H28 H 0.8885 -0.1229 -0.0511 0.088 Uiso 1 1 calc R . . 
C29 C 1.1301(5) -0.02699(17) 0.07386(15) 0.0477(8) Uani 1 1 d . A . 
C30 C 1.3072(6) -0.0428(2) 0.05654(18) 0.0628(11) Uani 1 1 d . . . 
H30 H 1.3885 -0.0114 0.0437 0.075 Uiso 1 1 calc R . . 
C31 C 1.3662(8) -0.1054(3) 0.0581(2) 0.0912(16) Uani 1 1 d . A . 
H31 H 1.4859 -0.1163 0.0457 0.109 Uiso 1 1 calc R . . 
C32 C 1.2465(10) -0.1506(2) 0.0778(2) 0.0971(18) Uani 1 1 d . . . 
C33 C 1.0747(10) -0.1365(2) 0.0966(2) 0.1008(19) Uani 1 1 d . A . 
H33 H 0.9964 -0.1680 0.1108 0.121 Uiso 1 1 calc R . . 
C34 C 1.0147(6) -0.0739(2) 0.09451(19) 0.0675(11) Uani 1 1 d . . . 
H34 H 0.8950 -0.0636 0.1073 0.081 Uiso 1 1 calc R A . 
C35 C 1.2841(4) 0.08034(16) 0.13969(14) 0.0427(8) Uani 1 1 d . . . 
C36 C 1.4670(5) 0.08828(19) 0.12224(16) 0.0523(9) Uani 1 1 d . . . 
H36 H 1.4913 0.1016 0.0849 0.063 Uiso 1 1 calc R . . 
C37 C 1.6140(5) 0.0769(2) 0.15881(18) 0.0610(11) Uani 1 1 d . . . 
H37 H 1.7368 0.0818 0.1461 0.073 Uiso 1 1 calc R . . 
C38 C 1.5784(5) 0.0582(2) 0.21476(18) 0.0603(10) Uani 1 1 d . . . 
C39 C 1.3998(6) 0.0506(2) 0.23284(17) 0.0663(11) Uani 1 1 d . . . 
H39 H 1.3765 0.0383 0.2705 0.080 Uiso 1 1 calc R . . 
C40 C 1.2517(5) 0.06097(18) 0.19586(15) 0.0522(9) Uani 1 1 d . . . 
H40 H 1.1295 0.0549 0.2086 0.063 Uiso 1 1 calc R . . 
C41 C 1.7111(8) 0.0339(3) 0.3060(3) 0.115(2) Uani 1 1 d . . . 
H41A H 1.6369 -0.0037 0.3107 0.172 Uiso 1 1 calc R . . 
H41B H 1.6484 0.0690 0.3237 0.172 Uiso 1 1 calc R . . 
H41C H 1.8312 0.0278 0.3238 0.172 Uiso 1 1 calc R . . 
N2A N 1.301(9) -0.214(3) 0.074(2) 0.171(3) Uani 0.438(14) 1 d PU A 2 
O7A O 1.457(3) -0.2305(8) 0.0499(9) 0.184(3) Uani 0.438(14) 1 d PU A 2 
O8A O 1.156(3) -0.2556(8) 0.0748(9) 0.169(3) Uani 0.438(14) 1 d PU A 2 
 
loop_ 
 _atom_site_aniso_label 
 _atom_site_aniso_U_11 
 _atom_site_aniso_U_22 
 _atom_site_aniso_U_33 
 _atom_site_aniso_U_23 
 _atom_site_aniso_U_13 
 _atom_site_aniso_U_12 
S1 0.0648(6) 0.0429(5) 0.0519(5) 0.0100(4) 0.0046(4) 0.0045(4) 
O1 0.0676(17) 0.0497(16) 0.082(2) 0.0112(14) 0.0085(14) -0.0032(13) 
O2 0.0885(19) 0.0570(17) 0.0607(16) 0.0217(14) 0.0071(15) 0.0240(14) 
O3 0.084(2) 0.0694(19) 0.0595(17) -0.0015(14) -0.0241(16) 0.0282(16) 
O4 0.0540(14) 0.0564(16) 0.0574(15) 0.0129(13) -0.0004(12) -0.0037(12) 
O5 0.0606(18) 0.097(2) 0.107(3) -0.036(2) -0.0003(17) -0.0120(18) 
O6 0.0711(18) 0.128(3) 0.070(2) 0.0259(19) -0.0257(16) 0.007(2) 
O7 0.285(7) 0.095(4) 0.171(8) 0.021(6) 0.052(7) 0.099(5) 
O8 0.276(8) 0.073(3) 0.157(7) 0.059(5) 0.071(6) 0.075(5) 
N1 0.0578(16) 0.0444(16) 0.0343(14) 0.0093(12) -0.0008(14) 0.0040(13) 
N2 0.272(7) 0.081(4) 0.160(7) 0.044(6) 0.075(6) 0.076(5) 
C1 0.057(2) 0.045(2) 0.049(2) -0.0013(16) -0.0028(16) 0.0048(17) 
C2 0.067(2) 0.055(2) 0.053(2) -0.0014(19) -0.0035(19) -0.0018(19) 
C3 0.066(2) 0.069(3) 0.074(3) -0.009(2) 0.007(2) 0.000(2) 
C4 0.086(3) 0.064(3) 0.071(3) -0.012(2) 0.009(2) 0.007(2) 
C5 0.093(3) 0.086(3) 0.057(3) -0.020(2) -0.006(2) 0.003(3) 
C6 0.064(2) 0.068(3) 0.064(3) -0.010(2) -0.009(2) 0.000(2) 
C7 0.121(4) 0.110(4) 0.078(4) -0.018(3) 0.029(3) 0.008(4) 
C8 0.057(2) 0.062(2) 0.0330(18) 0.0001(16) -0.0013(16) 0.0111(19) 
C9 0.0473(17) 0.047(2) 0.0319(16) -0.0004(14) 0.0010(14) 0.0093(16) 
C10 0.0428(16) 0.0465(19) 0.0346(16) 0.0019(14) 0.0067(14) 0.0034(15) 
C11 0.0489(18) 0.046(2) 0.0359(17) 0.0035(15) 0.0003(14) 0.0016(16) 
C12 0.081(2) 0.0369(19) 0.0370(18) 0.0036(14) -0.0050(18) 0.0012(18) 
C13 0.097(3) 0.060(3) 0.055(2) -0.0004(19) -0.031(2) 0.001(2) 
C14 0.183(7) 0.068(3) 0.055(3) -0.003(3) -0.047(4) 0.014(4) 
C15 0.188(6) 0.071(3) 0.038(3) 0.000(2) -0.005(4) 0.026(4) 
C16 0.157(5) 0.077(3) 0.055(3) 0.007(2) 0.030(3) 0.026(4) 
C17 0.100(3) 0.051(2) 0.047(2) 0.0088(18) 0.015(2) 0.000(2) 
C18 0.0464(19) 0.060(2) 0.042(2) -0.0023(17) -0.0032(15) 0.0083(17) 
C19 0.0455(18) 0.048(2) 0.0436(19) 0.0004(15) 0.0034(15) 0.0021(16) 
C20 0.0468(18) 0.049(2) 0.0362(17) 0.0003(14) 0.0107(14) 0.0012(17) 
C21 0.0444(17) 0.0422(18) 0.0353(17) 0.0048(14) 0.0082(14) 0.0050(15) 
C22 0.053(2) 0.053(2) 0.053(2) -0.0028(18) -0.0022(16) -0.0063(18) 
C23 0.066(2) 0.048(2) 0.044(2) -0.0095(16) -0.0010(17) -0.0072(18) 
C24 0.082(3) 0.048(2) 0.050(2) -0.0092(18) 0.0109(19) -0.006(2) 
C25 0.092(3) 0.066(3) 0.073(3) -0.009(2) 0.030(3) -0.012(2) 
C26 0.125(4) 0.072(3) 0.090(4) -0.019(3) 0.047(3) 0.002(3) 
C27 0.132(4) 0.052(3) 0.109(4) -0.020(3) 0.046(4) -0.009(3) 
C28 0.089(3) 0.056(3) 0.074(3) -0.013(2) 0.012(2) -0.017(2) 
C29 0.061(2) 0.0425(19) 0.0399(19) -0.0004(15) -0.0018(16) 0.0048(17) 
C30 0.069(2) 0.058(3) 0.061(3) -0.0033(19) 0.000(2) 0.017(2) 
C31 0.109(4) 0.079(4) 0.086(4) -0.004(3) 0.004(3) 0.048(3) 
C32 0.160(5) 0.055(3) 0.077(3) 0.018(2) 0.032(4) 0.037(3) 
C33 0.172(6) 0.049(3) 0.081(3) 0.014(3) 0.042(4) -0.002(3) 
C34 0.085(3) 0.057(2) 0.061(3) 0.003(2) 0.018(2) 0.004(2) 
C35 0.0407(16) 0.046(2) 0.0412(18) 0.0021(15) 0.0011(14) 0.0063(15) 
C36 0.0504(19) 0.064(2) 0.0423(19) 0.0082(17) 0.0028(16) 0.0043(19) 
C37 0.0442(19) 0.077(3) 0.062(3) 0.008(2) -0.0021(17) 0.001(2) 
C38 0.060(2) 0.063(3) 0.058(3) 0.0047(19) -0.013(2) 0.005(2) 
C39 0.072(3) 0.083(3) 0.044(2) 0.022(2) -0.0018(19) 0.005(2) 
C40 0.0524(19) 0.060(2) 0.044(2) 0.0116(17) 0.0045(16) -0.0001(18) 
C41 0.101(4) 0.157(6) 0.085(4) 0.029(4) -0.040(3) 0.017(4) 
N2A 0.272(7) 0.081(4) 0.160(7) 0.044(6) 0.075(6) 0.076(5) 
O7A 0.285(7) 0.095(4) 0.171(8) 0.021(6) 0.052(7) 0.099(5) 
O8A 0.276(8) 0.073(3) 0.157(7) 0.059(5) 0.071(6) 0.075(5) 
 
_geom_special_details 
; 
 All esds (except the esd in the dihedral angle between two l.s. planes) 
 are estimated using the full covariance matrix.  The cell esds are taken 
 into account individually in the estimation of esds in distances, angles 
 and torsion angles; correlations between esds in cell parameters are only 
 used when they are defined by crystal symmetry.  An approximate (isotropic) 
 treatment of cell esds is used for estimating esds involving l.s. planes. 
; 
 
loop_ 
 _geom_bond_atom_site_label_1 
 _geom_bond_atom_site_label_2 
 _geom_bond_distance 
 _geom_bond_site_symmetry_2 
 _geom_bond_publ_flag 
S1 O1 1.405(3) . ? 
S1 O2 1.427(3) . ? 
S1 N1 1.676(3) . ? 
S1 C1 1.749(4) . ? 
O3 C8 1.209(4) . ? 
O4 C11 1.387(4) . ? 
O4 H4 0.8200 . ? 
O5 C22 1.203(4) . ? 
O6 C38 1.371(5) . ? 
O6 C41 1.416(6) . ? 
O7 N2 1.28(5) . ? 
O8 N2 1.09(5) . ? 
N1 C8 1.404(5) . ? 
N1 C11 1.503(4) . ? 
N2 C32 1.49(5) . ? 
C1 C2 1.371(6) . ? 
C1 C6 1.382(5) . ? 
C2 C3 1.364(6) . ? 
C2 H2 0.9300 . ? 
C3 C4 1.407(6) . ? 
C3 H3 0.9300 . ? 
C4 C5 1.361(7) . ? 
C4 C7 1.496(6) . ? 
C5 C6 1.367(6) . ? 
C5 H5 0.9300 . ? 
C6 H6 0.9300 . ? 
C7 H7A 0.9600 . ? 
C7 H7B 0.9600 . ? 
C7 H7C 0.9600 . ? 
C8 C9 1.465(5) . ? 
C9 C10 1.377(4) . ? 
C9 C18 1.382(5) . ? 
C10 C21 1.396(5) . ? 
C10 C11 1.528(5) . ? 
C11 C12 1.530(5) . ? 
C12 C17 1.363(6) . ? 
C12 C13 1.379(5) . ? 
C13 C14 1.390(8) . ? 
C13 H13 0.9300 . ? 
C14 C15 1.325(9) . ? 
C14 H14 0.9300 . ? 
C15 C16 1.372(8) . ? 
C15 H15 0.9300 . ? 
C16 C17 1.402(7) . ? 
C16 H16 0.9300 . ? 
C17 H17 0.9300 . ? 
C18 C19 1.374(5) . ? 
C18 H18 0.9300 . ? 
C19 C20 1.412(5) . ? 
C19 C22 1.513(5) . ? 
C20 C21 1.415(5) . ? 
C20 C29 1.491(5) . ? 
C21 C35 1.481(5) . ? 
C22 C23 1.476(5) . ? 
C23 C24 1.371(5) . ? 
C23 C28 1.391(6) . ? 
C24 C25 1.377(6) . ? 
C24 H24 0.9300 . ? 
C25 C26 1.364(7) . ? 
C25 H25 0.9300 . ? 
C26 C27 1.370(7) . ? 
C26 H26 0.9300 . ? 
C27 C28 1.360(6) . ? 
C27 H27 0.9300 . ? 
C28 H28 0.9300 . ? 
C29 C30 1.367(5) . ? 
C29 C34 1.375(5) . ? 
C30 C31 1.388(6) . ? 
C30 H30 0.9300 . ? 
C31 C32 1.361(8) . ? 
C31 H31 0.9300 . ? 
C32 C33 1.335(9) . ? 
C32 N2A 1.40(6) . ? 
C33 C34 1.390(6) . ? 
C33 H33 0.9300 . ? 
C34 H34 0.9300 . ? 
C35 C36 1.377(5) . ? 
C35 C40 1.389(5) . ? 
C36 C37 1.373(5) . ? 
C36 H36 0.9300 . ? 
C37 C38 1.385(6) . ? 
C37 H37 0.9300 . ? 
C38 C39 1.351(6) . ? 
C39 C40 1.381(5) . ? 
C39 H39 0.9300 . ? 
C40 H40 0.9300 . ? 
C41 H41A 0.9600 . ? 
C41 H41B 0.9600 . ? 
C41 H41C 0.9600 . ? 
N2A O7A 1.29(6) . ? 
N2A O8A 1.35(7) . ? 
 
loop_ 
 _geom_angle_atom_site_label_1 
 _geom_angle_atom_site_label_2 
 _geom_angle_atom_site_label_3 
 _geom_angle 
 _geom_angle_site_symmetry_1 
 _geom_angle_site_symmetry_3 
 _geom_angle_publ_flag 
O1 S1 O2 119.63(18) . . ? 
O1 S1 N1 106.48(16) . . ? 
O2 S1 N1 106.22(16) . . ? 
O1 S1 C1 108.37(18) . . ? 
O2 S1 C1 108.93(17) . . ? 
N1 S1 C1 106.46(16) . . ? 
C11 O4 H4 109.5 . . ? 
C38 O6 C41 117.4(4) . . ? 
C8 N1 C11 112.9(3) . . ? 
C8 N1 S1 123.3(2) . . ? 
C11 N1 S1 123.7(2) . . ? 
O8 N2 O7 116(3) . . ? 
O8 N2 C32 125(4) . . ? 
O7 N2 C32 117(4) . . ? 
C2 C1 C6 119.5(4) . . ? 
C2 C1 S1 120.5(3) . . ? 
C6 C1 S1 120.0(3) . . ? 
C3 C2 C1 120.5(4) . . ? 
C3 C2 H2 119.8 . . ? 
C1 C2 H2 119.8 . . ? 
C2 C3 C4 120.5(4) . . ? 
C2 C3 H3 119.7 . . ? 
C4 C3 H3 119.7 . . ? 
C5 C4 C3 117.8(4) . . ? 
C5 C4 C7 121.4(5) . . ? 
C3 C4 C7 120.8(5) . . ? 
C4 C5 C6 122.1(4) . . ? 
C4 C5 H5 119.0 . . ? 
C6 C5 H5 119.0 . . ? 
C5 C6 C1 119.6(4) . . ? 
C5 C6 H6 120.2 . . ? 
C1 C6 H6 120.2 . . ? 
C4 C7 H7A 109.5 . . ? 
C4 C7 H7B 109.5 . . ? 
H7A C7 H7B 109.5 . . ? 
C4 C7 H7C 109.5 . . ? 
H7A C7 H7C 109.5 . . ? 
H7B C7 H7C 109.5 . . ? 
O3 C8 N1 125.9(3) . . ? 
O3 C8 C9 128.3(3) . . ? 
N1 C8 C9 105.8(3) . . ? 
C10 C9 C18 122.5(3) . . ? 
C10 C9 C8 110.4(3) . . ? 
C18 C9 C8 127.0(3) . . ? 
C9 C10 C21 121.8(3) . . ? 
C9 C10 C11 110.5(3) . . ? 
C21 C10 C11 127.7(3) . . ? 
O4 C11 N1 112.6(3) . . ? 
O4 C11 C10 111.4(3) . . ? 
N1 C11 C10 100.4(3) . . ? 
O4 C11 C12 108.9(3) . . ? 
N1 C11 C12 111.0(3) . . ? 
C10 C11 C12 112.4(3) . . ? 
C17 C12 C13 120.3(4) . . ? 
C17 C12 C11 119.6(3) . . ? 
C13 C12 C11 120.0(4) . . ? 
C12 C13 C14 119.0(6) . . ? 
C12 C13 H13 120.5 . . ? 
C14 C13 H13 120.5 . . ? 
C15 C14 C13 121.1(6) . . ? 
C15 C14 H14 119.5 . . ? 
C13 C14 H14 119.5 . . ? 
C14 C15 C16 120.8(5) . . ? 
C14 C15 H15 119.6 . . ? 
C16 C15 H15 119.6 . . ? 
C15 C16 C17 119.4(6) . . ? 
C15 C16 H16 120.3 . . ? 
C17 C16 H16 120.3 . . ? 
C12 C17 C16 119.3(5) . . ? 
C12 C17 H17 120.3 . . ? 
C16 C17 H17 120.3 . . ? 
C19 C18 C9 117.3(3) . . ? 
C19 C18 H18 121.4 . . ? 
C9 C18 H18 121.4 . . ? 
C18 C19 C20 121.2(3) . . ? 
C18 C19 C22 118.8(3) . . ? 
C20 C19 C22 120.0(3) . . ? 
C19 C20 C21 121.2(3) . . ? 
C19 C20 C29 117.8(3) . . ? 
C21 C20 C29 121.0(3) . . ? 
C10 C21 C20 115.7(3) . . ? 
C10 C21 C35 123.2(3) . . ? 
C20 C21 C35 121.1(3) . . ? 
O5 C22 C23 123.0(4) . . ? 
O5 C22 C19 120.7(3) . . ? 
C23 C22 C19 116.3(3) . . ? 
C24 C23 C28 119.1(4) . . ? 
C24 C23 C22 121.0(3) . . ? 
C28 C23 C22 119.8(4) . . ? 
C23 C24 C25 121.0(4) . . ? 
C23 C24 H24 119.5 . . ? 
C25 C24 H24 119.5 . . ? 
C26 C25 C24 118.8(5) . . ? 
C26 C25 H25 120.6 . . ? 
C24 C25 H25 120.6 . . ? 
C25 C26 C27 121.2(5) . . ? 
C25 C26 H26 119.4 . . ? 
C27 C26 H26 119.4 . . ? 
C28 C27 C26 119.9(4) . . ? 
C28 C27 H27 120.0 . . ? 
C26 C27 H27 120.0 . . ? 
C27 C28 C23 120.0(4) . . ? 
C27 C28 H28 120.0 . . ? 
C23 C28 H28 120.0 . . ? 
C30 C29 C34 118.8(4) . . ? 
C30 C29 C20 121.6(3) . . ? 
C34 C29 C20 119.4(3) . . ? 
C29 C30 C31 120.3(5) . . ? 
C29 C30 H30 119.8 . . ? 
C31 C30 H30 119.8 . . ? 
C32 C31 C30 119.1(5) . . ? 
C32 C31 H31 120.5 . . ? 
C30 C31 H31 120.5 . . ? 
C33 C32 C31 122.0(5) . . ? 
C33 C32 N2A 119(3) . . ? 
C31 C32 N2A 118(3) . . ? 
C33 C32 N2 122(2) . . ? 
C31 C32 N2 116(2) . . ? 
N2A C32 N2 11(4) . . ? 
C32 C33 C34 118.9(5) . . ? 
C32 C33 H33 120.5 . . ? 
C34 C33 H33 120.5 . . ? 
C29 C34 C33 120.8(4) . . ? 
C29 C34 H34 119.6 . . ? 
C33 C34 H34 119.6 . . ? 
C36 C35 C40 118.1(3) . . ? 
C36 C35 C21 120.5(3) . . ? 
C40 C35 C21 121.3(3) . . ? 
C37 C36 C35 121.4(3) . . ? 
C37 C36 H36 119.3 . . ? 
C35 C36 H36 119.3 . . ? 
C36 C37 C38 119.5(3) . . ? 
C36 C37 H37 120.2 . . ? 
C38 C37 H37 120.2 . . ? 
C39 C38 O6 125.6(4) . . ? 
C39 C38 C37 120.0(3) . . ? 
O6 C38 C37 114.3(3) . . ? 
C38 C39 C40 120.6(4) . . ? 
C38 C39 H39 119.7 . . ? 
C40 C39 H39 119.7 . . ? 
C39 C40 C35 120.4(3) . . ? 
C39 C40 H40 119.8 . . ? 
C35 C40 H40 119.8 . . ? 
O6 C41 H41A 109.5 . . ? 
O6 C41 H41B 109.5 . . ? 
H41A C41 H41B 109.5 . . ? 
O6 C41 H41C 109.5 . . ? 
H41A C41 H41C 109.5 . . ? 
H41B C41 H41C 109.5 . . ? 
O7A N2A O8A 119(5) . . ? 
O7A N2A C32 121(5) . . ? 
O8A N2A C32 114(4) . . ? 
 
_diffrn_measured_fraction_theta_max    0.997 
_diffrn_reflns_theta_full              25.34 
_diffrn_measured_fraction_theta_full   0.997 
_refine_diff_density_max    0.330 
_refine_diff_density_min   -0.293 
_refine_diff_density_rms    0.059 

#===END 

#===END 
data_130528_lzx052701(4ea) 
 
_audit_creation_method            SHELXL-97 
_chemical_name_systematic 
; 
 ? 
; 
_chemical_name_common             ? 
_chemical_melting_point           ? 
_chemical_formula_moiety          'C32 H28 Br N O5 S' 
_chemical_formula_sum 
 'C32 H28 Br N O5 S' 
_chemical_formula_weight          618.52 
 
loop_ 
 _atom_type_symbol 
 _atom_type_description 
 _atom_type_scat_dispersion_real 
 _atom_type_scat_dispersion_imag 
 _atom_type_scat_source 
 'C'  'C'   0.0033   0.0016 
 'International Tables Vol C Tables 4.2.6.8 and 6.1.1.4' 
 'H'  'H'   0.0000   0.0000 
 'International Tables Vol C Tables 4.2.6.8 and 6.1.1.4' 
 'Br'  'Br'  -0.2901   2.4595 
 'International Tables Vol C Tables 4.2.6.8 and 6.1.1.4' 
 'N'  'N'   0.0061   0.0033 
 'International Tables Vol C Tables 4.2.6.8 and 6.1.1.4' 
 'O'  'O'   0.0106   0.0060 
 'International Tables Vol C Tables 4.2.6.8 and 6.1.1.4' 
 'S'  'S'   0.1246   0.1234 
 'International Tables Vol C Tables 4.2.6.8 and 6.1.1.4' 
 
_symmetry_cell_setting            Triclinic
_symmetry_space_group_name_H-M    'P -1' 
_symmetry_space_group_name_Hall   '-P 1'
 
loop_ 
 _symmetry_equiv_pos_as_xyz 
 'x, y, z' 
 '-x, -y, -z' 
 
_cell_length_a                    11.5054(9) 
_cell_length_b                    11.6330(7) 
_cell_length_c                    12.6576(9) 
_cell_angle_alpha                 67.629(6) 
_cell_angle_beta                  77.980(6) 
_cell_angle_gamma                 63.713(7) 
_cell_volume                      1403.01(17) 
_cell_formula_units_Z             2 
_cell_measurement_temperature     170(2) 
_cell_measurement_reflns_used   2459
_cell_measurement_theta_min     3.1055
_cell_measurement_theta_max     29.5956
 
_exptl_crystal_description        block 
_exptl_crystal_colour             yellow 
_exptl_crystal_size_max           0.42 
_exptl_crystal_size_mid           0.32 
_exptl_crystal_size_min           0.30 
_exptl_crystal_density_meas       ? 
_exptl_crystal_density_diffrn     1.464 
_exptl_crystal_density_method     'not measured' 
_exptl_crystal_F_000              636 
_exptl_absorpt_coefficient_mu     1.582 
_exptl_absorpt_correction_type    multi-scan 
_exptl_absorpt_correction_T_min   0.5562 
_exptl_absorpt_correction_T_max   0.6482 
_exptl_absorpt_process_details    
;
CrysAlis PRO (Agilent Technologies, 2011) 
;
 
_exptl_special_details 
; 
 ? 
; 
 
_diffrn_ambient_temperature       170(2) 
_diffrn_radiation_wavelength      0.71073 
_diffrn_radiation_type            MoK\a 
_diffrn_radiation_source          'fine-focus sealed tube' 
_diffrn_radiation_monochromator   graphite 
_diffrn_measurement_device_type   'Xcalibur, Atlas, Gemini ultra' 
_diffrn_measurement_method        '\w scans' 
_diffrn_detector_area_resol_mean  10.3592 
_diffrn_standards_number          ? 
_diffrn_standards_interval_count  ? 
_diffrn_standards_interval_time   ? 
_diffrn_standards_decay_%         ? 
_diffrn_reflns_number             8941 
_diffrn_reflns_av_R_equivalents   0.0337 
_diffrn_reflns_av_sigmaI/netI     0.0595 
_diffrn_reflns_limit_h_min        -12 
_diffrn_reflns_limit_h_max        13 
_diffrn_reflns_limit_k_min        -14 
_diffrn_reflns_limit_k_max        11 
_diffrn_reflns_limit_l_min        -14 
_diffrn_reflns_limit_l_max        15 
_diffrn_reflns_theta_min          3.11 
_diffrn_reflns_theta_max          25.35 
_reflns_number_total              5130 
_reflns_number_gt                 3780 
_reflns_threshold_expression      >2sigma(I) 
 
_computing_cell_refinement      'CrysAlis PRO (Agilent Technologies, 2011)' 
_computing_data_collection      'CrysAlis PRO' 
_computing_data_reduction      'CrysAlis PRO'  
_computing_molecular_graphics     'OLEX2 (Dolomanov et al., 2009)'
_computing_publication_material    'OLEX2'
_computing_structure_solution     'SHELXS-97 (Sheldrick, 2008)' 
_computing_structure_refinement   'SHELXL-97 (Sheldrick, 2008)' 
 
_refine_special_details 
; 
 Refinement of F^2^ against ALL reflections.  The weighted R-factor wR and 
 goodness of fit S are based on F^2^, conventional R-factors R are based 
 on F, with F set to zero for negative F^2^. The threshold expression of 
 F^2^ > 2sigma(F^2^) is used only for calculating R-factors(gt) etc. and is 
 not relevant to the choice of reflections for refinement.  R-factors based 
 on F^2^ are statistically about twice as large as those based on F, and R- 
 factors based on ALL data will be even larger. 
; 
 
_refine_ls_structure_factor_coef  Fsqd  
_refine_ls_matrix_type            full 
_refine_ls_weighting_scheme       calc  
_refine_ls_weighting_details 
 'calc w=1/[\s^2^(Fo^2^)+(0.0317P)^2^+0.5837P] where P=(Fo^2^+2Fc^2^)/3' 
_atom_sites_solution_primary      direct 
_atom_sites_solution_secondary    difmap 
_atom_sites_solution_hydrogens    geom 
_refine_ls_hydrogen_treatment     mixed 
_refine_ls_extinction_method      none 
_refine_ls_extinction_coef        ? 
_refine_ls_number_reflns          5130 
_refine_ls_number_parameters      365 
_refine_ls_number_restraints      0 
_refine_ls_R_factor_all           0.0681 
_refine_ls_R_factor_gt            0.0421 
_refine_ls_wR_factor_ref          0.0946 
_refine_ls_wR_factor_gt           0.0832 
_refine_ls_goodness_of_fit_ref    1.023 
_refine_ls_restrained_S_all       1.023 
_refine_ls_shift/su_max           0.000 
_refine_ls_shift/su_mean          0.000 
 
loop_ 
 _atom_site_label 
 _atom_site_type_symbol 
 _atom_site_fract_x 
 _atom_site_fract_y 
 _atom_site_fract_z 
 _atom_site_U_iso_or_equiv 
 _atom_site_adp_type 
 _atom_site_occupancy 
 _atom_site_symmetry_multiplicity 
 _atom_site_calc_flag 
 _atom_site_refinement_flags 
 _atom_site_disorder_assembly 
 _atom_site_disorder_group 
Br1 Br 0.32124(4) -0.02576(4) 0.04408(3) 0.05726(15) Uani 1 1 d . . . 
S1 S -0.21624(7) 0.57963(6) 0.68850(6) 0.02493(18) Uani 1 1 d . . . 
O1 O -0.1796(2) 0.60455(17) 0.77556(16) 0.0313(5) Uani 1 1 d . . . 
O2 O -0.2522(2) 0.68311(17) 0.58084(16) 0.0315(5) Uani 1 1 d . . . 
O3 O -0.1798(2) 0.43422(17) 0.52430(16) 0.0274(5) Uani 1 1 d . . . 
O4 O 0.0999(2) 0.45245(17) 0.71102(15) 0.0275(5) Uani 1 1 d . . . 
H4 H 0.1263 0.4743 0.6422 0.041 Uiso 1 1 calc R . . 
O5 O 0.2032(3) -0.1730(2) 0.62090(18) 0.0518(7) Uani 1 1 d . . . 
N1 N -0.0880(2) 0.4462(2) 0.66463(18) 0.0225(5) Uani 1 1 d . . . 
C1 C -0.3400(3) 0.5212(2) 0.7433(2) 0.0241(6) Uani 1 1 d . . . 
C2 C -0.4343(3) 0.5514(3) 0.6723(2) 0.0313(7) Uani 1 1 d . . . 
H2 H -0.4279 0.5972 0.5926 0.038 Uiso 1 1 calc R . . 
C3 C -0.5377(3) 0.5140(3) 0.7191(3) 0.0359(8) Uani 1 1 d . . . 
H3 H -0.6031 0.5360 0.6711 0.043 Uiso 1 1 calc R . . 
C4 C -0.5465(3) 0.4449(3) 0.8349(3) 0.0357(8) Uani 1 1 d . . . 
C5 C -0.4508(3) 0.4138(3) 0.9036(3) 0.0346(8) Uani 1 1 d . . . 
H5 H -0.4557 0.3650 0.9829 0.042 Uiso 1 1 calc R . . 
C6 C -0.3482(3) 0.4521(2) 0.8596(2) 0.0280(7) Uani 1 1 d . . . 
H6 H -0.2840 0.4315 0.9082 0.034 Uiso 1 1 calc R . . 
C7 C -0.6603(4) 0.4066(4) 0.8863(3) 0.0559(10) Uani 1 1 d . . . 
H7A H -0.6294 0.3076 0.9182 0.084 Uiso 1 1 calc R . . 
H7B H -0.7214 0.4414 0.8269 0.084 Uiso 1 1 calc R . . 
H7C H -0.7040 0.4461 0.9471 0.084 Uiso 1 1 calc R . . 
C8 C 0.0364(3) 0.3679(2) 0.7291(2) 0.0229(6) Uani 1 1 d . . . 
C9 C 0.1061(3) 0.2547(2) 0.6753(2) 0.0220(6) Uani 1 1 d . . . 
C10 C 0.0255(3) 0.2618(2) 0.6040(2) 0.0237(6) Uani 1 1 d . . . 
C11 C -0.0934(3) 0.3875(2) 0.5889(2) 0.0225(6) Uani 1 1 d . . . 
C12 C 0.0598(3) 0.1621(3) 0.5558(2) 0.0265(7) Uani 1 1 d . . . 
H12 H 0.0052 0.1693 0.5046 0.032 Uiso 1 1 calc R . . 
C13 C 0.1768(3) 0.0512(3) 0.5847(2) 0.0255(7) Uani 1 1 d . . . 
C14 C 0.2643(3) 0.0478(3) 0.6499(2) 0.0257(7) Uani 1 1 d . . . 
C15 C 0.2302(3) 0.1524(2) 0.6949(2) 0.0234(6) Uani 1 1 d . . . 
C16 C 0.0083(3) 0.3114(2) 0.8571(2) 0.0245(6) Uani 1 1 d . . . 
C17 C -0.0434(3) 0.2139(3) 0.8982(2) 0.0302(7) Uani 1 1 d . . . 
H17 H -0.0588 0.1815 0.8462 0.036 Uiso 1 1 calc R . . 
C18 C -0.0729(3) 0.1633(3) 1.0141(3) 0.0382(8) Uani 1 1 d . . . 
H18 H -0.1095 0.0977 1.0412 0.046 Uiso 1 1 calc R . . 
C19 C -0.0486(3) 0.2090(3) 1.0902(3) 0.0420(9) Uani 1 1 d . . . 
H19 H -0.0682 0.1745 1.1697 0.050 Uiso 1 1 calc R . . 
C20 C 0.0042(3) 0.3049(3) 1.0499(2) 0.0381(8) Uani 1 1 d . . . 
H20 H 0.0211 0.3361 1.1020 0.046 Uiso 1 1 calc R . . 
C21 C 0.0324(3) 0.3552(3) 0.9347(2) 0.0318(7) Uani 1 1 d . . . 
H21 H 0.0689 0.4209 0.9081 0.038 Uiso 1 1 calc R . . 
C22 C 0.3253(3) 0.1617(3) 0.7537(2) 0.0277(7) Uani 1 1 d . . . 
H22A H 0.3854 0.0691 0.7960 0.033 Uiso 1 1 calc R . . 
H22B H 0.2778 0.2096 0.8096 0.033 Uiso 1 1 calc R . . 
C23 C 0.4035(3) 0.2376(3) 0.6673(3) 0.0363(7) Uani 1 1 d . . . 
H23A H 0.4544 0.1875 0.6144 0.054 Uiso 1 1 calc R . . 
H23B H 0.4621 0.2452 0.7079 0.054 Uiso 1 1 calc R . . 
H23C H 0.3441 0.3285 0.6241 0.054 Uiso 1 1 calc R . . 
C24 C 0.3964(3) -0.0696(3) 0.6719(2) 0.0340(7) Uani 1 1 d . . . 
H24A H 0.4623 -0.0346 0.6672 0.041 Uiso 1 1 calc R . . 
H24B H 0.4197 -0.1123 0.6118 0.041 Uiso 1 1 calc R . . 
C25 C 0.3983(4) -0.1767(3) 0.7895(3) 0.0476(10) Uani 1 1 d . . . 
H25A H 0.3419 -0.2203 0.7908 0.071 Uiso 1 1 calc R . . 
H25B H 0.3671 -0.1331 0.8485 0.071 Uiso 1 1 calc R . . 
H25C H 0.4872 -0.2452 0.8043 0.071 Uiso 1 1 calc R . . 
C26 C 0.2056(3) -0.0688(3) 0.5485(2) 0.0301(7) Uani 1 1 d . . . 
C27 C 0.2335(3) -0.0562(3) 0.4263(2) 0.0242(6) Uani 1 1 d . . . 
C28 C 0.2461(3) 0.0584(3) 0.3448(2) 0.0303(7) Uani 1 1 d . . . 
H28 H 0.2369 0.1311 0.3676 0.036 Uiso 1 1 calc R . . 
C29 C 0.2720(3) 0.0678(3) 0.2314(2) 0.0339(7) Uani 1 1 d . . . 
H29 H 0.2815 0.1458 0.1757 0.041 Uiso 1 1 calc R . . 
C30 C 0.2837(3) -0.0386(3) 0.2002(2) 0.0318(7) Uani 1 1 d . . . 
C31 C 0.2723(3) -0.1539(3) 0.2787(2) 0.0304(7) Uani 1 1 d . . . 
H31 H 0.2810 -0.2257 0.2550 0.037 Uiso 1 1 calc R . . 
C32 C 0.2482(3) -0.1632(3) 0.3917(2) 0.0265(7) Uani 1 1 d . . . 
H32 H 0.2414 -0.2429 0.4471 0.032 Uiso 1 1 calc R . . 
 
loop_ 
 _atom_site_aniso_label 
 _atom_site_aniso_U_11 
 _atom_site_aniso_U_22 
 _atom_site_aniso_U_33 
 _atom_site_aniso_U_23 
 _atom_site_aniso_U_13 
 _atom_site_aniso_U_12 
Br1 0.0856(4) 0.0543(2) 0.0294(2) -0.02001(16) 0.00199(19) -0.0229(2) 
S1 0.0266(5) 0.0182(3) 0.0300(4) -0.0096(3) -0.0003(3) -0.0081(3) 
O1 0.0314(13) 0.0256(10) 0.0413(12) -0.0185(9) -0.0027(10) -0.0085(9) 
O2 0.0343(14) 0.0199(9) 0.0342(11) -0.0036(8) -0.0023(10) -0.0099(9) 
O3 0.0269(13) 0.0271(10) 0.0287(11) -0.0091(8) -0.0029(10) -0.0106(9) 
O4 0.0307(13) 0.0295(10) 0.0271(11) -0.0091(8) 0.0002(9) -0.0170(9) 
O5 0.091(2) 0.0331(12) 0.0347(13) -0.0124(10) 0.0128(13) -0.0336(13) 
N1 0.0225(14) 0.0193(11) 0.0249(12) -0.0083(9) -0.0017(10) -0.0066(10) 
C1 0.0206(17) 0.0190(13) 0.0304(16) -0.0118(11) 0.0023(13) -0.0045(12) 
C2 0.033(2) 0.0284(15) 0.0298(16) -0.0114(12) 0.0002(14) -0.0090(14) 
C3 0.030(2) 0.0372(17) 0.047(2) -0.0203(14) -0.0011(15) -0.0140(15) 
C4 0.034(2) 0.0376(17) 0.045(2) -0.0238(15) 0.0111(16) -0.0193(15) 
C5 0.040(2) 0.0307(16) 0.0287(17) -0.0108(13) 0.0087(15) -0.0147(15) 
C6 0.0282(19) 0.0217(14) 0.0295(16) -0.0104(12) 0.0000(13) -0.0049(13) 
C7 0.049(3) 0.072(2) 0.065(2) -0.035(2) 0.019(2) -0.038(2) 
C8 0.0240(18) 0.0209(13) 0.0261(15) -0.0084(11) -0.0012(13) -0.0104(12) 
C9 0.0244(18) 0.0225(13) 0.0196(14) -0.0074(11) 0.0045(12) -0.0120(12) 
C10 0.0253(18) 0.0222(14) 0.0244(15) -0.0083(11) 0.0037(12) -0.0120(12) 
C11 0.0220(18) 0.0217(13) 0.0250(15) -0.0073(11) 0.0024(13) -0.0116(12) 
C12 0.0288(19) 0.0313(15) 0.0264(15) -0.0133(12) 0.0026(13) -0.0166(14) 
C13 0.0305(19) 0.0232(14) 0.0214(14) -0.0083(11) 0.0051(13) -0.0116(13) 
C14 0.0276(18) 0.0233(14) 0.0198(14) -0.0061(11) 0.0032(13) -0.0076(12) 
C15 0.0240(18) 0.0219(13) 0.0196(14) -0.0050(11) 0.0025(12) -0.0083(12) 
C16 0.0229(18) 0.0193(13) 0.0261(15) -0.0090(11) 0.0007(13) -0.0035(12) 
C17 0.032(2) 0.0254(14) 0.0319(17) -0.0107(12) -0.0003(14) -0.0098(13) 
C18 0.041(2) 0.0287(15) 0.0381(18) -0.0067(13) 0.0059(16) -0.0150(15) 
C19 0.048(2) 0.0352(17) 0.0254(17) -0.0061(13) 0.0052(15) -0.0081(16) 
C20 0.047(2) 0.0362(17) 0.0291(17) -0.0162(13) -0.0019(15) -0.0101(16) 
C21 0.036(2) 0.0289(15) 0.0309(17) -0.0128(12) 0.0012(14) -0.0122(14) 
C22 0.0256(18) 0.0272(14) 0.0261(15) -0.0117(12) -0.0039(13) -0.0035(13) 
C23 0.027(2) 0.0403(17) 0.0406(18) -0.0122(14) -0.0021(15) -0.0134(15) 
C24 0.036(2) 0.0289(15) 0.0276(16) -0.0133(12) -0.0016(14) -0.0020(14) 
C25 0.061(3) 0.0267(16) 0.0353(18) -0.0107(13) -0.0022(17) -0.0004(16) 
C26 0.034(2) 0.0249(15) 0.0305(16) -0.0106(13) 0.0023(14) -0.0113(13) 
C27 0.0205(17) 0.0244(14) 0.0300(15) -0.0117(12) 0.0013(13) -0.0097(12) 
C28 0.038(2) 0.0248(14) 0.0323(17) -0.0131(12) 0.0002(14) -0.0137(13) 
C29 0.043(2) 0.0266(15) 0.0286(16) -0.0075(12) -0.0009(15) -0.0131(14) 
C30 0.033(2) 0.0335(16) 0.0249(15) -0.0138(12) -0.0009(14) -0.0068(14) 
C31 0.0296(19) 0.0288(15) 0.0389(18) -0.0205(13) -0.0002(14) -0.0096(13) 
C32 0.0226(18) 0.0225(14) 0.0354(17) -0.0110(12) 0.0016(13) -0.0099(12) 
 
_geom_special_details 
; 
 All esds (except the esd in the dihedral angle between two l.s. planes) 
 are estimated using the full covariance matrix.  The cell esds are taken 
 into account individually in the estimation of esds in distances, angles 
 and torsion angles; correlations between esds in cell parameters are only 
 used when they are defined by crystal symmetry.  An approximate (isotropic) 
 treatment of cell esds is used for estimating esds involving l.s. planes. 
; 
 
loop_ 
 _geom_bond_atom_site_label_1 
 _geom_bond_atom_site_label_2 
 _geom_bond_distance 
 _geom_bond_site_symmetry_2 
 _geom_bond_publ_flag 
Br1 C30 1.895(3) . ? 
S1 O1 1.421(2) . ? 
S1 O2 1.4221(19) . ? 
S1 N1 1.680(2) . ? 
S1 C1 1.749(3) . ? 
O3 C11 1.214(3) . ? 
O4 C8 1.396(3) . ? 
O4 H4 0.8400 . ? 
O5 C26 1.218(3) . ? 
N1 C11 1.396(3) . ? 
N1 C8 1.520(4) . ? 
C1 C6 1.389(4) . ? 
C1 C2 1.391(4) . ? 
C2 C3 1.387(4) . ? 
C2 H2 0.9500 . ? 
C3 C4 1.385(4) . ? 
C3 H3 0.9500 . ? 
C4 C5 1.380(4) . ? 
C4 C7 1.509(5) . ? 
C5 C6 1.381(4) . ? 
C5 H5 0.9500 . ? 
C6 H6 0.9500 . ? 
C7 H7A 0.9800 . ? 
C7 H7B 0.9800 . ? 
C7 H7C 0.9800 . ? 
C8 C16 1.524(4) . ? 
C8 C9 1.537(3) . ? 
C9 C10 1.380(4) . ? 
C9 C15 1.391(4) . ? 
C10 C12 1.382(3) . ? 
C10 C11 1.473(4) . ? 
C12 C13 1.384(4) . ? 
C12 H12 0.9500 . ? 
C13 C14 1.408(4) . ? 
C13 C26 1.511(4) . ? 
C14 C15 1.404(4) . ? 
C14 C24 1.517(4) . ? 
C15 C22 1.507(4) . ? 
C16 C21 1.387(4) . ? 
C16 C17 1.389(4) . ? 
C17 C18 1.388(4) . ? 
C17 H17 0.9500 . ? 
C18 C19 1.385(4) . ? 
C18 H18 0.9500 . ? 
C19 C20 1.383(4) . ? 
C19 H19 0.9500 . ? 
C20 C21 1.377(4) . ? 
C20 H20 0.9500 . ? 
C21 H21 0.9500 . ? 
C22 C23 1.531(4) . ? 
C22 H22A 0.9900 . ? 
C22 H22B 0.9900 . ? 
C23 H23A 0.9800 . ? 
C23 H23B 0.9800 . ? 
C23 H23C 0.9800 . ? 
C24 C25 1.532(4) . ? 
C24 H24A 0.9900 . ? 
C24 H24B 0.9900 . ? 
C25 H25A 0.9800 . ? 
C25 H25B 0.9800 . ? 
C25 H25C 0.9800 . ? 
C26 C27 1.477(4) . ? 
C27 C28 1.387(4) . ? 
C27 C32 1.403(3) . ? 
C28 C29 1.376(4) . ? 
C28 H28 0.9500 . ? 
C29 C30 1.381(4) . ? 
C29 H29 0.9500 . ? 
C30 C31 1.375(4) . ? 
C31 C32 1.370(4) . ? 
C31 H31 0.9500 . ? 
C32 H32 0.9500 . ? 
 
loop_ 
 _geom_angle_atom_site_label_1 
 _geom_angle_atom_site_label_2 
 _geom_angle_atom_site_label_3 
 _geom_angle 
 _geom_angle_site_symmetry_1 
 _geom_angle_site_symmetry_3 
 _geom_angle_publ_flag 
O1 S1 O2 120.16(11) . . ? 
O1 S1 N1 105.40(12) . . ? 
O2 S1 N1 107.61(11) . . ? 
O1 S1 C1 109.18(13) . . ? 
O2 S1 C1 108.62(13) . . ? 
N1 S1 C1 104.78(11) . . ? 
C8 O4 H4 109.5 . . ? 
C11 N1 C8 113.1(2) . . ? 
C11 N1 S1 121.02(19) . . ? 
C8 N1 S1 125.51(16) . . ? 
C6 C1 C2 120.2(3) . . ? 
C6 C1 S1 119.4(2) . . ? 
C2 C1 S1 120.2(2) . . ? 
C3 C2 C1 119.4(3) . . ? 
C3 C2 H2 120.3 . . ? 
C1 C2 H2 120.3 . . ? 
C4 C3 C2 120.7(3) . . ? 
C4 C3 H3 119.6 . . ? 
C2 C3 H3 119.6 . . ? 
C5 C4 C3 119.0(3) . . ? 
C5 C4 C7 120.2(3) . . ? 
C3 C4 C7 120.8(3) . . ? 
C4 C5 C6 121.4(3) . . ? 
C4 C5 H5 119.3 . . ? 
C6 C5 H5 119.3 . . ? 
C5 C6 C1 119.2(3) . . ? 
C5 C6 H6 120.4 . . ? 
C1 C6 H6 120.4 . . ? 
C4 C7 H7A 109.5 . . ? 
C4 C7 H7B 109.5 . . ? 
H7A C7 H7B 109.5 . . ? 
C4 C7 H7C 109.5 . . ? 
H7A C7 H7C 109.5 . . ? 
H7B C7 H7C 109.5 . . ? 
O4 C8 N1 110.22(19) . . ? 
O4 C8 C16 108.7(2) . . ? 
N1 C8 C16 111.1(2) . . ? 
O4 C8 C9 115.2(2) . . ? 
N1 C8 C9 99.7(2) . . ? 
C16 C8 C9 111.7(2) . . ? 
C10 C9 C15 121.6(2) . . ? 
C10 C9 C8 110.5(2) . . ? 
C15 C9 C8 127.8(2) . . ? 
C9 C10 C12 121.7(3) . . ? 
C9 C10 C11 110.1(2) . . ? 
C12 C10 C11 128.2(3) . . ? 
O3 C11 N1 125.5(2) . . ? 
O3 C11 C10 128.6(2) . . ? 
N1 C11 C10 105.9(2) . . ? 
C10 C12 C13 117.5(3) . . ? 
C10 C12 H12 121.2 . . ? 
C13 C12 H12 121.2 . . ? 
C12 C13 C14 121.1(2) . . ? 
C12 C13 C26 118.1(3) . . ? 
C14 C13 C26 120.7(2) . . ? 
C15 C14 C13 120.5(3) . . ? 
C15 C14 C24 119.6(3) . . ? 
C13 C14 C24 119.9(2) . . ? 
C9 C15 C14 116.9(3) . . ? 
C9 C15 C22 120.5(2) . . ? 
C14 C15 C22 122.4(3) . . ? 
C21 C16 C17 118.6(3) . . ? 
C21 C16 C8 121.6(2) . . ? 
C17 C16 C8 119.8(2) . . ? 
C18 C17 C16 120.9(3) . . ? 
C18 C17 H17 119.6 . . ? 
C16 C17 H17 119.6 . . ? 
C19 C18 C17 119.6(3) . . ? 
C19 C18 H18 120.2 . . ? 
C17 C18 H18 120.2 . . ? 
C20 C19 C18 119.8(3) . . ? 
C20 C19 H19 120.1 . . ? 
C18 C19 H19 120.1 . . ? 
C21 C20 C19 120.3(3) . . ? 
C21 C20 H20 119.9 . . ? 
C19 C20 H20 119.9 . . ? 
C20 C21 C16 120.9(3) . . ? 
C20 C21 H21 119.6 . . ? 
C16 C21 H21 119.6 . . ? 
C15 C22 C23 111.2(2) . . ? 
C15 C22 H22A 109.4 . . ? 
C23 C22 H22A 109.4 . . ? 
C15 C22 H22B 109.4 . . ? 
C23 C22 H22B 109.4 . . ? 
H22A C22 H22B 108.0 . . ? 
C22 C23 H23A 109.5 . . ? 
C22 C23 H23B 109.5 . . ? 
H23A C23 H23B 109.5 . . ? 
C22 C23 H23C 109.5 . . ? 
H23A C23 H23C 109.5 . . ? 
H23B C23 H23C 109.5 . . ? 
C14 C24 C25 111.8(3) . . ? 
C14 C24 H24A 109.3 . . ? 
C25 C24 H24A 109.3 . . ? 
C14 C24 H24B 109.3 . . ? 
C25 C24 H24B 109.3 . . ? 
H24A C24 H24B 107.9 . . ? 
C24 C25 H25A 109.5 . . ? 
C24 C25 H25B 109.5 . . ? 
H25A C25 H25B 109.5 . . ? 
C24 C25 H25C 109.5 . . ? 
H25A C25 H25C 109.5 . . ? 
H25B C25 H25C 109.5 . . ? 
O5 C26 C27 121.7(2) . . ? 
O5 C26 C13 119.0(2) . . ? 
C27 C26 C13 119.3(2) . . ? 
C28 C27 C32 119.2(2) . . ? 
C28 C27 C26 121.7(2) . . ? 
C32 C27 C26 119.1(2) . . ? 
C29 C28 C27 120.6(2) . . ? 
C29 C28 H28 119.7 . . ? 
C27 C28 H28 119.7 . . ? 
C28 C29 C30 118.6(3) . . ? 
C28 C29 H29 120.7 . . ? 
C30 C29 H29 120.7 . . ? 
C31 C30 C29 122.3(3) . . ? 
C31 C30 Br1 119.4(2) . . ? 
C29 C30 Br1 118.4(2) . . ? 
C32 C31 C30 118.8(2) . . ? 
C32 C31 H31 120.6 . . ? 
C30 C31 H31 120.6 . . ? 
C31 C32 C27 120.5(2) . . ? 
C31 C32 H32 119.8 . . ? 
C27 C32 H32 119.8 . . ? 
 
_diffrn_measured_fraction_theta_max    0.997 
_diffrn_reflns_theta_full              25.35 
_diffrn_measured_fraction_theta_full   0.997 
_refine_diff_density_max    0.391 
_refine_diff_density_min   -0.395 
_refine_diff_density_rms    0.063

#===END

#===END
 
data_131224_lzx1223 (5aa) 
 
_audit_creation_method            SHELXL-97 
_chemical_name_systematic 
; 
 ? 
; 
_chemical_name_common             ? 
_chemical_melting_point           ? 
_chemical_formula_moiety          'C25 H22 O4'
_chemical_formula_sum 
 'C25 H22 O4' 
_chemical_formula_weight          386.43 
 
loop_ 
 _atom_type_symbol 
 _atom_type_description 
 _atom_type_scat_dispersion_real 
 _atom_type_scat_dispersion_imag 
 _atom_type_scat_source 
 'C'  'C'   0.0033   0.0016 
 'International Tables Vol C Tables 4.2.6.8 and 6.1.1.4' 
 'H'  'H'   0.0000   0.0000 
 'International Tables Vol C Tables 4.2.6.8 and 6.1.1.4' 
 'O'  'O'   0.0106   0.0060 
 'International Tables Vol C Tables 4.2.6.8 and 6.1.1.4' 
 
_symmetry_cell_setting            monoclinic
_symmetry_space_group_name_H-M    'P 21/n' 
_symmetry_space_group_name_Hall   '-P 2yn'
 
loop_ 
 _symmetry_equiv_pos_as_xyz 
 'x, y, z' 
 '-x+1/2, y+1/2, -z+1/2' 
 '-x, -y, -z' 
 'x-1/2, -y-1/2, z-1/2' 
 
_cell_length_a                    14.7523(14) 
_cell_length_b                    8.2733(9) 
_cell_length_c                    17.2655(15) 
_cell_angle_alpha                 90.00 
_cell_angle_beta                  93.721(8) 
_cell_angle_gamma                 90.00 
_cell_volume                      2102.8(3) 
_cell_formula_units_Z             4 
_cell_measurement_temperature     293(2) 
_cell_measurement_reflns_used   2597
_cell_measurement_theta_min     2.8104
_cell_measurement_theta_max     29.1104
 
_exptl_crystal_description        block
_exptl_crystal_colour             colorless 
_exptl_crystal_size_max           0.32 
_exptl_crystal_size_mid           0.28 
_exptl_crystal_size_min           0.20 
_exptl_crystal_density_meas       ? 
_exptl_crystal_density_diffrn     1.221 
_exptl_crystal_density_method     'not measured' 
_exptl_crystal_F_000              816 
_exptl_absorpt_coefficient_mu     0.082 
_exptl_absorpt_correction_type    multi-scan  
_exptl_absorpt_correction_T_min   0.9742 
_exptl_absorpt_correction_T_max   0.9838 
_exptl_absorpt_process_details    
;
CrysAlis PRO (Agilent Technologies, 2011) 
;
 
_exptl_special_details 
; 
 ? 
; 
 
_diffrn_ambient_temperature       293(2) 
_diffrn_radiation_wavelength      0.71073 
_diffrn_radiation_type            MoK\a 
_diffrn_radiation_source          'fine-focus sealed tube' 
_diffrn_radiation_monochromator   graphite 
_diffrn_measurement_device_type   'Xcalibur, Atlas, Gemini ultra' 
_diffrn_measurement_method        '\w scans' 
_diffrn_detector_area_resol_mean  10.3592 
_diffrn_standards_number          ? 
_diffrn_standards_interval_count  ? 
_diffrn_standards_interval_time   ? 
_diffrn_standards_decay_%         ? 
_diffrn_reflns_number             8882 
_diffrn_reflns_av_R_equivalents   0.0443 
_diffrn_reflns_av_sigmaI/netI     0.0568 
_diffrn_reflns_limit_h_min        -17 
_diffrn_reflns_limit_h_max        17 
_diffrn_reflns_limit_k_min        -9 
_diffrn_reflns_limit_k_max        8 
_diffrn_reflns_limit_l_min        -17 
_diffrn_reflns_limit_l_max        20 
_diffrn_reflns_theta_min          3.52 
_diffrn_reflns_theta_max          25.35 
_reflns_number_total              3826 
_reflns_number_gt                 2498 
_reflns_threshold_expression      >2sigma(I) 
 
_computing_cell_refinement      'CrysAlis PRO (Agilent Technologies, 2011)' 
_computing_data_collection      'CrysAlis PRO' 
_computing_data_reduction      'CrysAlis PRO'  
_computing_molecular_graphics     'OLEX2 (Dolomanov et al., 2009)'
_computing_publication_material    'OLEX2'
_computing_structure_solution     'SHELXS-97 (Sheldrick, 2008)' 
_computing_structure_refinement   'SHELXL-97 (Sheldrick, 2008)' 
 
_refine_special_details 
; 
 Refinement of F^2^ against ALL reflections.  The weighted R-factor wR and 
 goodness of fit S are based on F^2^, conventional R-factors R are based 
 on F, with F set to zero for negative F^2^. The threshold expression of 
 F^2^ > 2sigma(F^2^) is used only for calculating R-factors(gt) etc. and is 
 not relevant to the choice of reflections for refinement.  R-factors based 
 on F^2^ are statistically about twice as large as those based on F, and R- 
 factors based on ALL data will be even larger. 
; 
 
_refine_ls_structure_factor_coef  Fsqd  
_refine_ls_matrix_type            full 
_refine_ls_weighting_scheme       calc  
_refine_ls_weighting_details 
 'calc w=1/[\s^2^(Fo^2^)+(0.0667P)^2^+0.1250P] where P=(Fo^2^+2Fc^2^)/3' 
_atom_sites_solution_primary      direct 
_atom_sites_solution_secondary    difmap 
_atom_sites_solution_hydrogens    geom 
_refine_ls_hydrogen_treatment     mixed 
_refine_ls_extinction_method      none 
_refine_ls_extinction_coef        ? 
_refine_ls_number_reflns          3826 
_refine_ls_number_parameters      265 
_refine_ls_number_restraints      0 
_refine_ls_R_factor_all           0.0910 
_refine_ls_R_factor_gt            0.0533 
_refine_ls_wR_factor_ref          0.1496 
_refine_ls_wR_factor_gt           0.1249 
_refine_ls_goodness_of_fit_ref    1.030 
_refine_ls_restrained_S_all       1.030 
_refine_ls_shift/su_max           0.000 
_refine_ls_shift/su_mean          0.000 
 
loop_ 
 _atom_site_label 
 _atom_site_type_symbol 
 _atom_site_fract_x 
 _atom_site_fract_y 
 _atom_site_fract_z 
 _atom_site_U_iso_or_equiv 
 _atom_site_adp_type 
 _atom_site_occupancy 
 _atom_site_symmetry_multiplicity 
 _atom_site_calc_flag 
 _atom_site_refinement_flags 
 _atom_site_disorder_assembly 
 _atom_site_disorder_group 
O1 O 0.12868(11) 0.5376(2) 0.08419(12) 0.0821(6) Uani 1 1 d . . . 
O2 O 0.53320(10) 0.83367(19) 0.04743(9) 0.0541(4) Uani 1 1 d . . . 
O3 O 0.39136(9) 0.9066(2) 0.01235(10) 0.0634(5) Uani 1 1 d . . . 
H3 H 0.4175 0.9826 -0.0070 0.095 Uiso 1 1 calc R . . 
O4 O 0.62200(9) 0.52098(19) 0.11032(8) 0.0497(4) Uani 1 1 d . . . 
C1 C 0.22897(16) 0.2213(3) -0.02491(12) 0.0556(6) Uani 1 1 d . . . 
H1 H 0.2900 0.2445 -0.0134 0.067 Uiso 1 1 calc R . . 
C2 C 0.20473(19) 0.0962(4) -0.07457(15) 0.0732(8) Uani 1 1 d . . . 
H2 H 0.2494 0.0339 -0.0957 0.088 Uiso 1 1 calc R . . 
C3 C 0.1148(2) 0.0634(4) -0.09292(15) 0.0783(8) Uani 1 1 d . . . 
H3A H 0.0987 -0.0212 -0.1266 0.094 Uiso 1 1 calc R . . 
C4 C 0.04829(19) 0.1545(4) -0.06192(16) 0.0768(8) Uani 1 1 d . . . 
H4 H -0.0126 0.1320 -0.0749 0.092 Uiso 1 1 calc R . . 
C5 C 0.07165(15) 0.2789(3) -0.01164(13) 0.0598(7) Uani 1 1 d . . . 
H5 H 0.0265 0.3404 0.0093 0.072 Uiso 1 1 calc R . . 
C6 C 0.16265(14) 0.3131(3) 0.00801(11) 0.0433(5) Uani 1 1 d . . . 
C7 C 0.18663(14) 0.4476(3) 0.06151(12) 0.0460(6) Uani 1 1 d . . . 
C8 C 0.28493(13) 0.4799(3) 0.08642(11) 0.0382(5) Uani 1 1 d . . . 
C9 C 0.32244(13) 0.6188(3) 0.05706(10) 0.0387(5) Uani 1 1 d . . . 
H9 H 0.2869 0.6861 0.0244 0.046 Uiso 1 1 calc R . . 
C10 C 0.41241(13) 0.6581(2) 0.07605(10) 0.0347(5) Uani 1 1 d . . . 
C11 C 0.46536(12) 0.5565(2) 0.12549(10) 0.0343(5) Uani 1 1 d . . . 
C12 C 0.42684(13) 0.4197(2) 0.15803(10) 0.0383(5) Uani 1 1 d . . . 
C13 C 0.33594(14) 0.3805(2) 0.13846(11) 0.0401(5) Uani 1 1 d . . . 
C14 C 0.45146(14) 0.8062(3) 0.04412(11) 0.0415(5) Uani 1 1 d . . . 
C15 C 0.56501(13) 0.5900(2) 0.14597(10) 0.0358(5) Uani 1 1 d . . . 
C16 C 0.59000(13) 0.6971(2) 0.21249(11) 0.0382(5) Uani 1 1 d . . . 
C17 C 0.52535(15) 0.7692(3) 0.25578(12) 0.0492(6) Uani 1 1 d . . . 
H17 H 0.4639 0.7526 0.2426 0.059 Uiso 1 1 calc R . . 
C18 C 0.5518(2) 0.8659(3) 0.31863(13) 0.0663(7) Uani 1 1 d . . . 
H18 H 0.5083 0.9145 0.3475 0.080 Uiso 1 1 calc R . . 
C19 C 0.6424(2) 0.8899(3) 0.33827(15) 0.0747(8) Uani 1 1 d . . . 
H19 H 0.6601 0.9551 0.3804 0.090 Uiso 1 1 calc R . . 
C20 C 0.70621(19) 0.8190(4) 0.29651(15) 0.0728(8) Uani 1 1 d . . . 
H20 H 0.7675 0.8350 0.3106 0.087 Uiso 1 1 calc R . . 
C21 C 0.68113(15) 0.7238(3) 0.23372(13) 0.0553(6) Uani 1 1 d . . . 
H21 H 0.7255 0.6769 0.2051 0.066 Uiso 1 1 calc R . . 
C22 C 0.48556(15) 0.3130(3) 0.21196(12) 0.0514(6) Uani 1 1 d . . . 
H22A H 0.4484 0.2664 0.2506 0.062 Uiso 1 1 calc R . . 
H22B H 0.5321 0.3785 0.2389 0.062 Uiso 1 1 calc R . . 
C23 C 0.53064(19) 0.1775(3) 0.16901(16) 0.0772(8) Uani 1 1 d . . . 
H23A H 0.5673 0.2229 0.1306 0.116 Uiso 1 1 calc R . . 
H23B H 0.4848 0.1094 0.1442 0.116 Uiso 1 1 calc R . . 
H23C H 0.5682 0.1148 0.2052 0.116 Uiso 1 1 calc R . . 
C24 C 0.28987(16) 0.2403(3) 0.17645(13) 0.0562(6) Uani 1 1 d . . . 
H24A H 0.3341 0.1558 0.1886 0.067 Uiso 1 1 calc R . . 
H24B H 0.2431 0.1963 0.1404 0.067 Uiso 1 1 calc R . . 
C25 C 0.2474(2) 0.2927(4) 0.25064(16) 0.0867(10) Uani 1 1 d . . . 
H25A H 0.2036 0.3763 0.2388 0.130 Uiso 1 1 calc R . . 
H25B H 0.2939 0.3328 0.2871 0.130 Uiso 1 1 calc R . . 
H25C H 0.2179 0.2018 0.2728 0.130 Uiso 1 1 calc R . . 
 
loop_ 
 _atom_site_aniso_label 
 _atom_site_aniso_U_11 
 _atom_site_aniso_U_22 
 _atom_site_aniso_U_33 
 _atom_site_aniso_U_23 
 _atom_site_aniso_U_13 
 _atom_site_aniso_U_12 
O1 0.0387(10) 0.0794(14) 0.1279(15) -0.0370(12) 0.0033(10) -0.0003(10) 
O2 0.0334(9) 0.0508(10) 0.0772(10) 0.0261(8) -0.0045(7) -0.0063(7) 
O3 0.0363(9) 0.0518(11) 0.1010(13) 0.0364(9) -0.0038(8) -0.0005(8) 
O4 0.0416(9) 0.0535(10) 0.0539(8) -0.0040(8) 0.0019(7) 0.0073(7) 
C1 0.0469(14) 0.0603(16) 0.0581(13) -0.0066(13) -0.0075(11) 0.0002(12) 
C2 0.0719(19) 0.073(2) 0.0728(16) -0.0186(15) -0.0103(14) 0.0094(15) 
C3 0.089(2) 0.071(2) 0.0720(16) -0.0163(16) -0.0205(16) -0.0089(17) 
C4 0.0567(17) 0.089(2) 0.0812(17) -0.0104(17) -0.0209(14) -0.0238(16) 
C5 0.0397(13) 0.0723(18) 0.0663(14) -0.0006(14) -0.0047(11) -0.0110(12) 
C6 0.0362(12) 0.0471(14) 0.0459(11) 0.0067(10) -0.0027(9) -0.0070(10) 
C7 0.0323(12) 0.0469(14) 0.0591(12) 0.0020(11) 0.0048(10) -0.0036(10) 
C8 0.0335(11) 0.0365(12) 0.0448(10) -0.0018(10) 0.0040(9) -0.0051(9) 
C9 0.0330(11) 0.0411(13) 0.0414(10) 0.0062(10) -0.0016(8) 0.0003(9) 
C10 0.0331(11) 0.0332(11) 0.0377(9) 0.0038(9) 0.0009(8) -0.0027(9) 
C11 0.0337(11) 0.0320(11) 0.0367(9) -0.0011(9) -0.0006(8) -0.0023(9) 
C12 0.0416(12) 0.0337(12) 0.0391(10) 0.0022(9) -0.0022(8) -0.0042(9) 
C13 0.0435(12) 0.0333(12) 0.0432(10) 0.0016(9) 0.0012(9) -0.0074(10) 
C14 0.0330(12) 0.0419(13) 0.0492(11) 0.0091(10) -0.0017(9) -0.0006(10) 
C15 0.0317(11) 0.0349(12) 0.0405(10) 0.0063(9) 0.0012(8) 0.0017(9) 
C16 0.0332(11) 0.0363(12) 0.0446(10) 0.0040(10) -0.0015(9) -0.0024(9) 
C17 0.0452(13) 0.0497(14) 0.0527(12) -0.0034(11) 0.0029(10) -0.0031(11) 
C18 0.083(2) 0.0616(17) 0.0557(13) -0.0097(13) 0.0130(13) 0.0004(15) 
C19 0.097(2) 0.0642(19) 0.0610(14) -0.0163(14) -0.0125(15) -0.0212(17) 
C20 0.0589(17) 0.074(2) 0.0820(17) -0.0135(16) -0.0210(14) -0.0164(15) 
C21 0.0393(13) 0.0568(16) 0.0689(14) -0.0062(13) -0.0030(11) -0.0088(12) 
C22 0.0547(14) 0.0444(14) 0.0530(12) 0.0130(11) -0.0121(10) -0.0071(11) 
C23 0.080(2) 0.0482(17) 0.1008(19) 0.0068(15) -0.0150(16) 0.0118(15) 
C24 0.0525(14) 0.0488(15) 0.0657(14) 0.0174(12) -0.0075(11) -0.0160(12) 
C25 0.089(2) 0.088(2) 0.0865(18) 0.0278(18) 0.0311(16) -0.0144(18) 
 
_geom_special_details 
; 
 All esds (except the esd in the dihedral angle between two l.s. planes) 
 are estimated using the full covariance matrix.  The cell esds are taken 
 into account individually in the estimation of esds in distances, angles 
 and torsion angles; correlations between esds in cell parameters are only 
 used when they are defined by crystal symmetry.  An approximate (isotropic) 
 treatment of cell esds is used for estimating esds involving l.s. planes. 
; 
 
loop_ 
 _geom_bond_atom_site_label_1 
 _geom_bond_atom_site_label_2 
 _geom_bond_distance 
 _geom_bond_site_symmetry_2 
 _geom_bond_publ_flag 
O1 C7 1.217(2) . ? 
O2 C14 1.225(2) . ? 
O3 C14 1.309(2) . ? 
O3 H3 0.8200 . ? 
O4 C15 1.216(2) . ? 
C1 C2 1.376(3) . ? 
C1 C6 1.389(3) . ? 
C1 H1 0.9300 . ? 
C2 C3 1.371(4) . ? 
C2 H2 0.9300 . ? 
C3 C4 1.373(4) . ? 
C3 H3A 0.9300 . ? 
C4 C5 1.376(4) . ? 
C4 H4 0.9300 . ? 
C5 C6 1.392(3) . ? 
C5 H5 0.9300 . ? 
C6 C7 1.475(3) . ? 
C7 C8 1.509(3) . ? 
C8 C9 1.385(3) . ? 
C8 C13 1.401(3) . ? 
C9 C10 1.385(3) . ? 
C9 H9 0.9300 . ? 
C10 C11 1.399(3) . ? 
C10 C14 1.476(3) . ? 
C11 C12 1.400(3) . ? 
C11 C15 1.515(3) . ? 
C12 C13 1.400(3) . ? 
C12 C22 1.514(3) . ? 
C13 C24 1.515(3) . ? 
C15 C16 1.478(3) . ? 
C16 C17 1.385(3) . ? 
C16 C21 1.388(3) . ? 
C17 C18 1.384(3) . ? 
C17 H17 0.9300 . ? 
C18 C19 1.371(4) . ? 
C18 H18 0.9300 . ? 
C19 C20 1.356(4) . ? 
C19 H19 0.9300 . ? 
C20 C21 1.371(3) . ? 
C20 H20 0.9300 . ? 
C21 H21 0.9300 . ? 
C22 C23 1.520(3) . ? 
C22 H22A 0.9700 . ? 
C22 H22B 0.9700 . ? 
C23 H23A 0.9600 . ? 
C23 H23B 0.9600 . ? 
C23 H23C 0.9600 . ? 
C24 C25 1.525(3) . ? 
C24 H24A 0.9700 . ? 
C24 H24B 0.9700 . ? 
C25 H25A 0.9600 . ? 
C25 H25B 0.9600 . ? 
C25 H25C 0.9600 . ? 
 
loop_ 
 _geom_angle_atom_site_label_1 
 _geom_angle_atom_site_label_2 
 _geom_angle_atom_site_label_3 
 _geom_angle 
 _geom_angle_site_symmetry_1 
 _geom_angle_site_symmetry_3 
 _geom_angle_publ_flag 
C14 O3 H3 109.5 . . ? 
C2 C1 C6 120.3(2) . . ? 
C2 C1 H1 119.9 . . ? 
C6 C1 H1 119.9 . . ? 
C3 C2 C1 120.1(3) . . ? 
C3 C2 H2 120.0 . . ? 
C1 C2 H2 120.0 . . ? 
C2 C3 C4 120.4(3) . . ? 
C2 C3 H3A 119.8 . . ? 
C4 C3 H3A 119.8 . . ? 
C3 C4 C5 120.1(2) . . ? 
C3 C4 H4 120.0 . . ? 
C5 C4 H4 120.0 . . ? 
C4 C5 C6 120.2(2) . . ? 
C4 C5 H5 119.9 . . ? 
C6 C5 H5 119.9 . . ? 
C1 C6 C5 118.9(2) . . ? 
C1 C6 C7 121.48(19) . . ? 
C5 C6 C7 119.6(2) . . ? 
O1 C7 C6 121.2(2) . . ? 
O1 C7 C8 118.8(2) . . ? 
C6 C7 C8 119.94(18) . . ? 
C9 C8 C13 120.74(18) . . ? 
C9 C8 C7 116.22(18) . . ? 
C13 C8 C7 123.00(18) . . ? 
C10 C9 C8 120.49(18) . . ? 
C10 C9 H9 119.8 . . ? 
C8 C9 H9 119.8 . . ? 
C9 C10 C11 119.46(17) . . ? 
C9 C10 C14 119.85(17) . . ? 
C11 C10 C14 120.69(17) . . ? 
C10 C11 C12 120.34(17) . . ? 
C10 C11 C15 121.81(16) . . ? 
C12 C11 C15 117.85(17) . . ? 
C13 C12 C11 119.87(18) . . ? 
C13 C12 C22 120.94(18) . . ? 
C11 C12 C22 119.16(18) . . ? 
C12 C13 C8 119.00(17) . . ? 
C12 C13 C24 121.52(18) . . ? 
C8 C13 C24 119.34(18) . . ? 
O2 C14 O3 122.66(19) . . ? 
O2 C14 C10 122.92(18) . . ? 
O3 C14 C10 114.41(17) . . ? 
O4 C15 C16 121.93(17) . . ? 
O4 C15 C11 119.21(18) . . ? 
C16 C15 C11 118.71(16) . . ? 
C17 C16 C21 118.6(2) . . ? 
C17 C16 C15 122.14(18) . . ? 
C21 C16 C15 119.30(18) . . ? 
C18 C17 C16 120.2(2) . . ? 
C18 C17 H17 119.9 . . ? 
C16 C17 H17 119.9 . . ? 
C19 C18 C17 119.9(2) . . ? 
C19 C18 H18 120.0 . . ? 
C17 C18 H18 120.0 . . ? 
C20 C19 C18 120.3(2) . . ? 
C20 C19 H19 119.8 . . ? 
C18 C19 H19 119.8 . . ? 
C19 C20 C21 120.5(2) . . ? 
C19 C20 H20 119.7 . . ? 
C21 C20 H20 119.7 . . ? 
C20 C21 C16 120.5(2) . . ? 
C20 C21 H21 119.8 . . ? 
C16 C21 H21 119.8 . . ? 
C12 C22 C23 112.38(17) . . ? 
C12 C22 H22A 109.1 . . ? 
C23 C22 H22A 109.1 . . ? 
C12 C22 H22B 109.1 . . ? 
C23 C22 H22B 109.1 . . ? 
H22A C22 H22B 107.9 . . ? 
C22 C23 H23A 109.5 . . ? 
C22 C23 H23B 109.5 . . ? 
H23A C23 H23B 109.5 . . ? 
C22 C23 H23C 109.5 . . ? 
H23A C23 H23C 109.5 . . ? 
H23B C23 H23C 109.5 . . ? 
C13 C24 C25 111.5(2) . . ? 
C13 C24 H24A 109.3 . . ? 
C25 C24 H24A 109.3 . . ? 
C13 C24 H24B 109.3 . . ? 
C25 C24 H24B 109.3 . . ? 
H24A C24 H24B 108.0 . . ? 
C24 C25 H25A 109.5 . . ? 
C24 C25 H25B 109.5 . . ? 
H25A C25 H25B 109.5 . . ? 
C24 C25 H25C 109.5 . . ? 
H25A C25 H25C 109.5 . . ? 
H25B C25 H25C 109.5 . . ? 
 
_diffrn_measured_fraction_theta_max    0.996 
_diffrn_reflns_theta_full              25.35 
_diffrn_measured_fraction_theta_full   0.996 
_refine_diff_density_max    0.164 
_refine_diff_density_min   -0.192 
_refine_diff_density_rms    0.043

#===END 

 
